# Supplementary material for: The electrochemical storage mechanism in oxy-hydroxyfluorinated anatase for sodium-ion batteries
Source: Royal Society of Chemistry journal article supplement (doi:10.1039/c8qi00185e), 2018-01-01
Supplement: c8qi00185e1.pdf [file c8qi00185e1.pdf]

## Supporting information

### Electrochemical Storage Mechanism in oxy-Hydroxyfluorinated Anatase for Sodium-ion Batteries

Wei Li,<sup>a</sup> Mika Fukunishi,<sup>b</sup> Benjamin. J. Morgan,<sup>c</sup> Olaf. J. Borkiewicz,<sup>d</sup> Valérie Pralong,<sup>e</sup>  
Antoine Maignan,<sup>e</sup> Henri Groult,<sup>a</sup> Shinichi Komaba,<sup>b</sup> and Damien Dambournet<sup>\*a,f</sup>

- a. Sorbonne Université, CNRS, Physico-chimie des électrolytes et nano-systèmes interfaciaux, PHENIX, F-75005 Paris, France. Email: [damien.dambournet@sorbonne-universite.fr](mailto:damien.dambournet@sorbonne-universite.fr)
- b. Department of Applied Chemistry, Tokyo University of Science, 1-3 Kagurazaka, Shinjuku, Tokyo 162-8601, Japan
- c. Department of Chemistry, University of Bath, Claverton Down, BA2 7AY, United Kingdom
- d. X-ray Science Division, Advanced Photon Source, Argonne National Laboratory, 9700 South Cass Avenue, Argonne, Illinois 60439, United States
- e. Laboratoire CRISMAT, ENSICAEN, Université de Caen, CNRS, 6 Bd Maréchal Juin, F-14050 Caen, France
- f. Réseau sur le Stockage Electrochimique de l'Energie (RS2E), FR CNRS 3459, 80039 Amiens, France

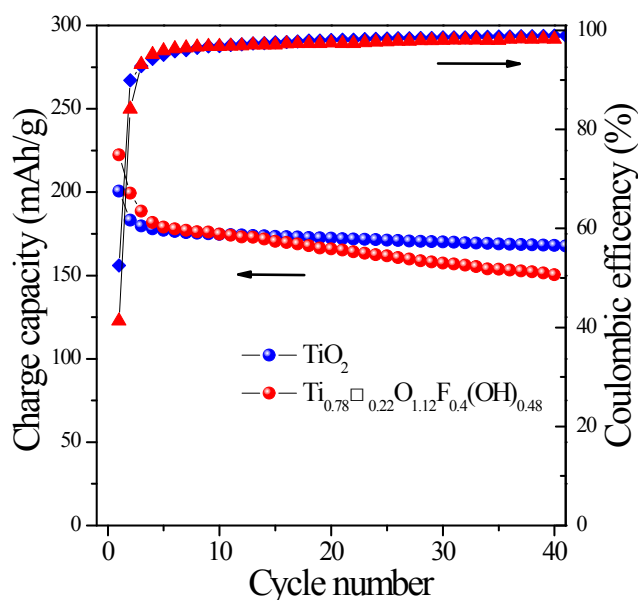

**Figure S1.** Cycling behavior of  $\text{Ti}_{0.78}\square_{0.22}\text{O}_{1.12}\text{F}_{0.4}(\text{OH})_{0.48}$  vs.  $\text{TiO}_2$ . The cell was cycled between 0 – 2 V at a current density of 25 mA/g.

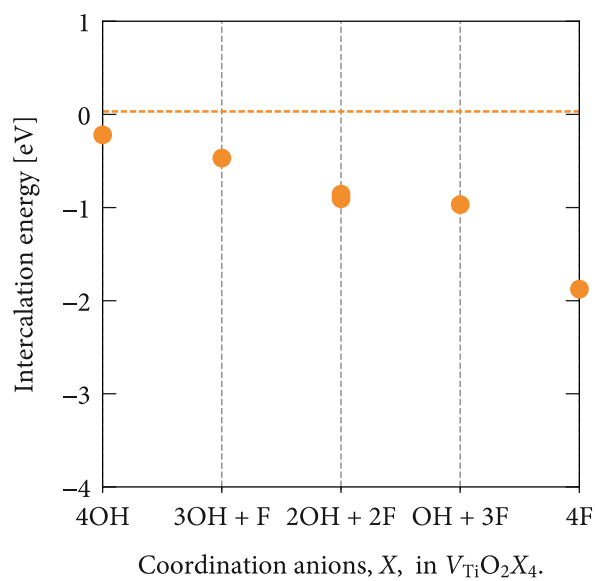

**Figure S2.** Intercalation energy of lithium in a  $Ti_{35}O_{68}X_4$  supercell with  $X = F^-$ ,  $OH^-$ . The horizontal dashed line shows the intercalation energy for lithium in stoichiometric anatase  $TiO_2$ . Source: The data set and code to generate this figure, and the figure file, are available under the MIT licence as part of <sup>1</sup>.

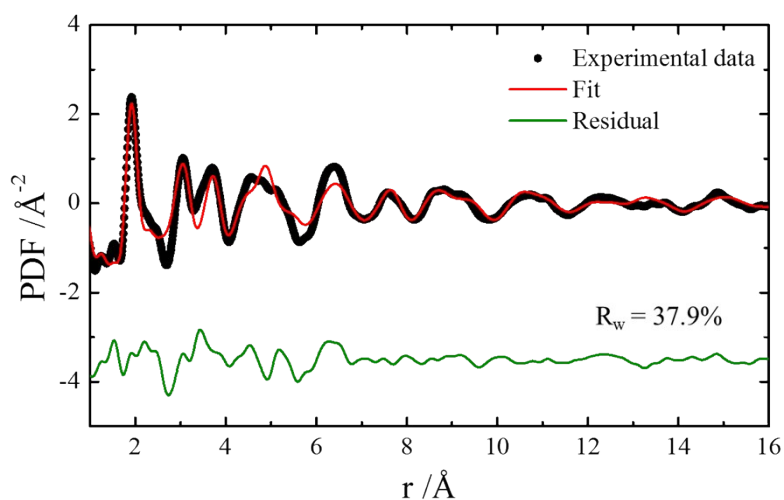

**Figure S3.** PDF refinement of the electrode charged to 2.0 V using  $TiO_2$  anatase and O3-type  $Na_xTiO_2$  (space group: R-3m) model.

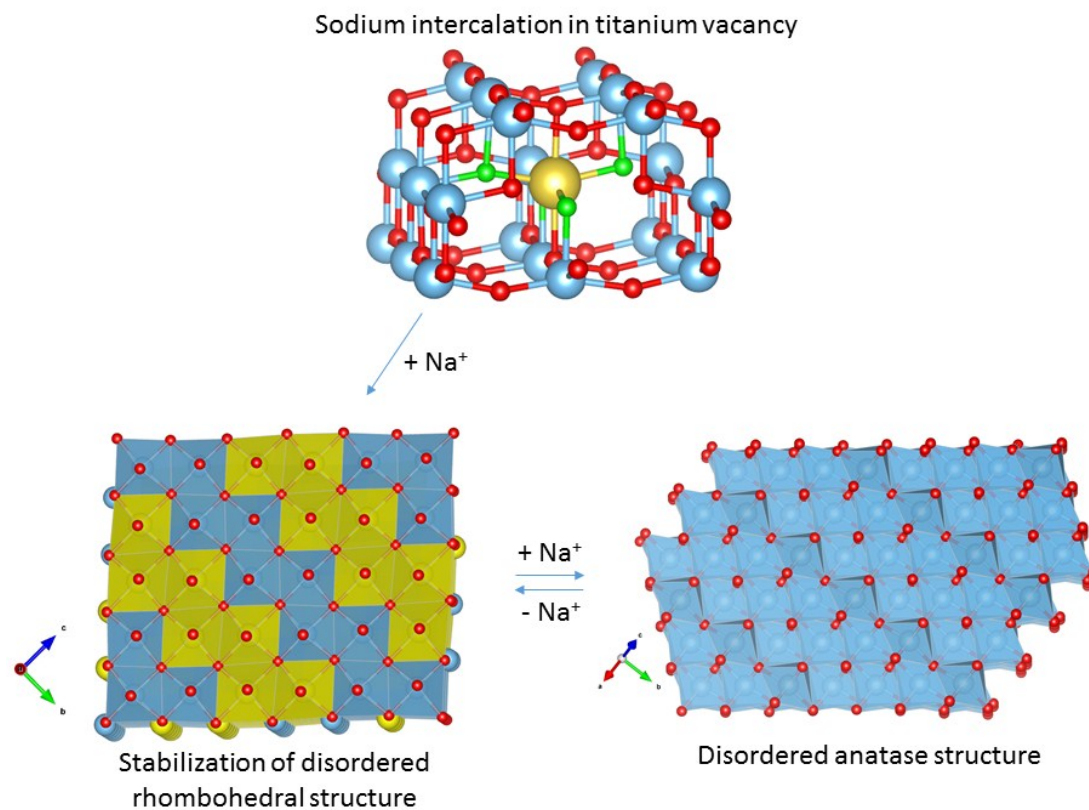

**Figure S4.** Structural representation of the sodium storage mechanism occurring in defective anatase.

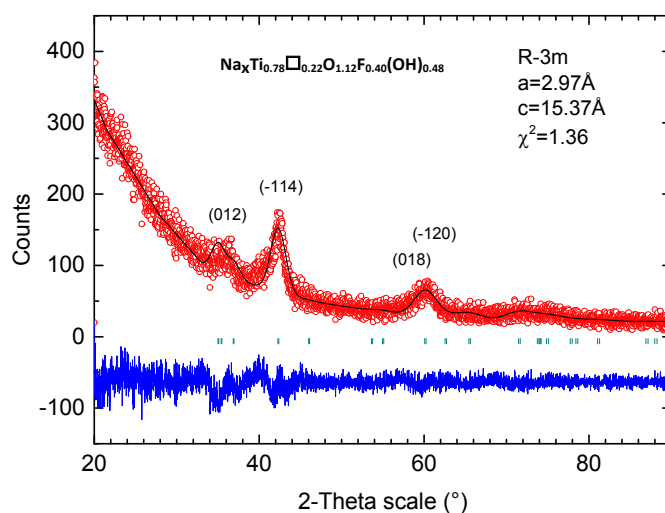

**Figure S5.** Le Bail profile refinement of the x-ray diffraction powder pattern of the reduced  $\text{Na}_x\text{Ti}_{0.78}\square_{0.22}\text{O}_{1.12}\text{F}_{0.40}(\text{OH})_{0.48}$  obtained by chemical sodiation.

#### Reference

- 1 B. J. Morgan, DFT Data Analysis: Intercalation of X=(Li, Na, Mg, Ca, Al) into (F/OH)-substituted anatase  $\text{TiO}_2$ . Zenodo 2017, <http://doi.org/10.5281/zenodo.1181872>.
